# Supplementary material
Source: publisher site journal article supplement (https://www.dovepress.com/article/301645)
Supplement: Supplementary file 1 [file get_supplementary_file.php]

**Appendix 1.**

**Table S1: Attitudes and Beliefs Scales towards COVID-19 Vaccination**

| *Please note that we are asking you to indicate the degree to which you would agree or disagree with each item. If you feel that a particular item is strongly agreed, you would circle “1”, If it is strongly disagreed, you would circle “5”* | | | | | |
| --- | --- | --- | --- | --- | --- |
|  | Strongly agree | agree | neither agree nor disagree | disagree | Strongly disagree |
| 1. I am at high risk of COVID-19 infection | 1 | 2 | 3 | 4 | 5 |
| 2. I think I will get COVID-19 in the near future | 1 | 2 | 3 | 4 | 5 |
| 3. I could be severely ill if I got COVID-19 | 1 | 2 | 3 | 4 | 5 |
| 4. I am afraid of even think about getting illness with COVID-19 | 1 | 2 | 3 | 4 | 5 |
| 5. Immunization will prevent me from contracting COVID-19 | 1 | 2 | 3 | 4 | 5 |
| 6. By being immunized and not getting illness, I will protect others from COVID-19 | 1 | 2 | 3 | 4 | 5 |
| 7. By being immunized, I feel less worried about possibility of severe illness from getting COVID-19 | 1 | 2 | 3 | 4 | 5 |
| 8. I am afraid that COVID-19 vaccine can cause AEFIs | 1 | 2 | 3 | 4 | 5 |
| 9. COVID-19 infection can be self-limiting and unnecessary vaccination | 1 | 2 | 3 | 4 | 5 |
| 10. I think that the cost of COVID-19 vaccine will be expensive | 1 | 2 | 3 | 4 | 5 |
| 11. I think that all people should be vaccinated to promote public health | 1 | 2 | 3 | 4 | 5 |
| 12. I will receive a COVID-19 vaccine if my healthcare workers recommended a vaccination | 1 | 2 | 3 | 4 | 5 |
